# Supplementary material
Source: PubMed Central journal article supplement (PMC4976803)

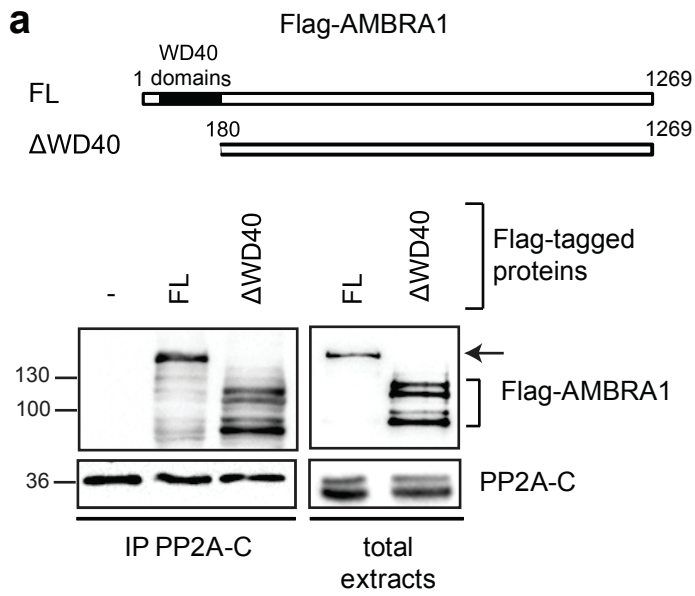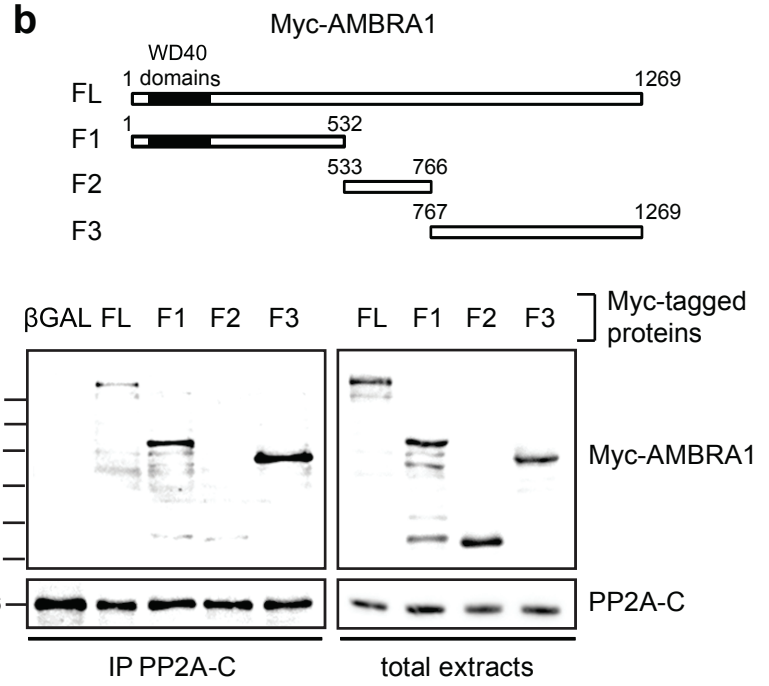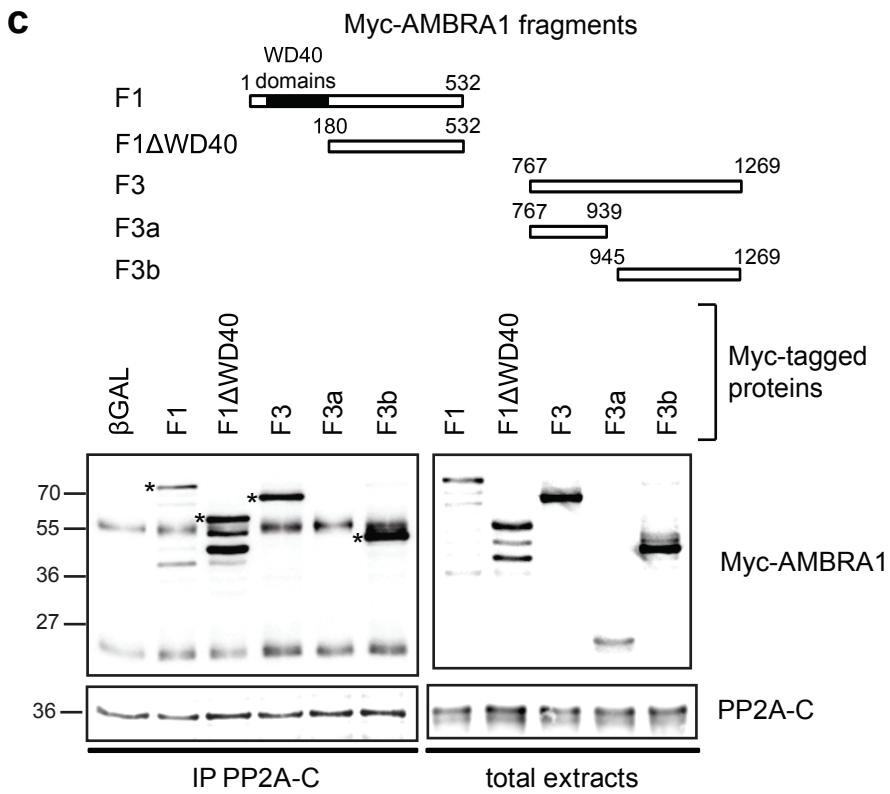

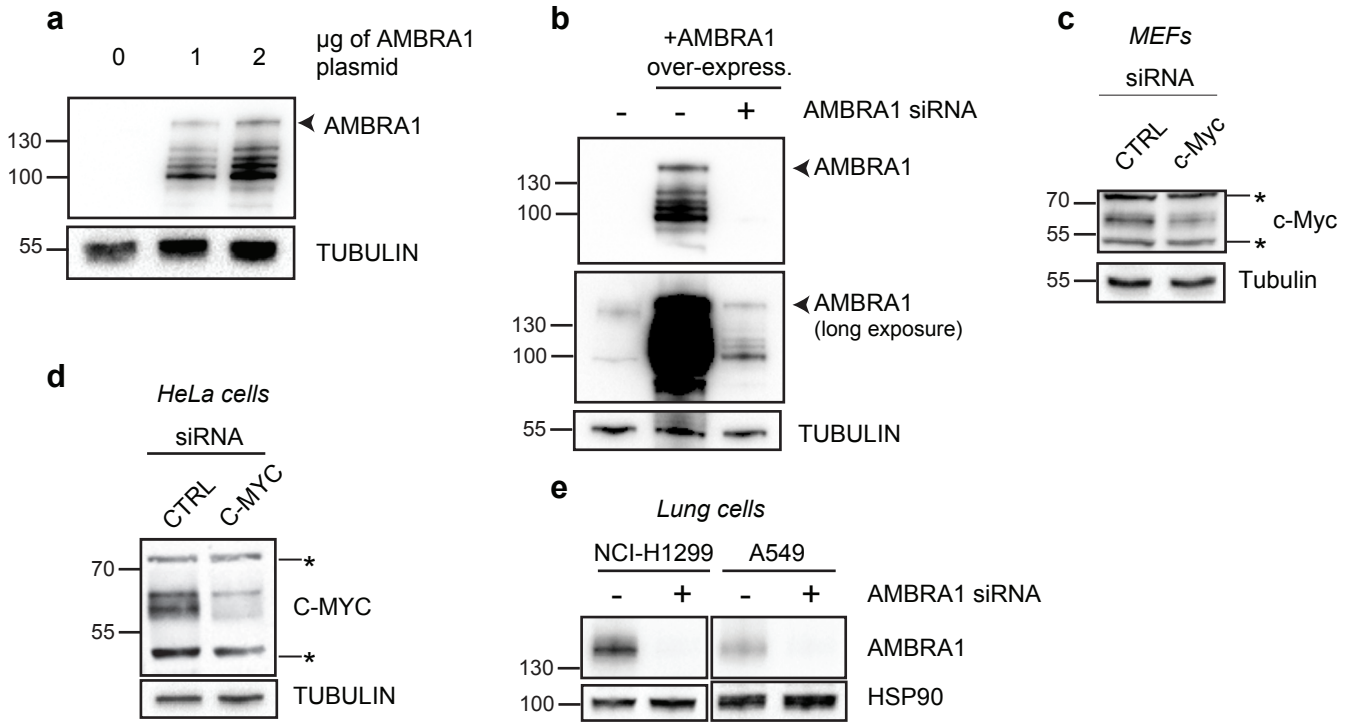

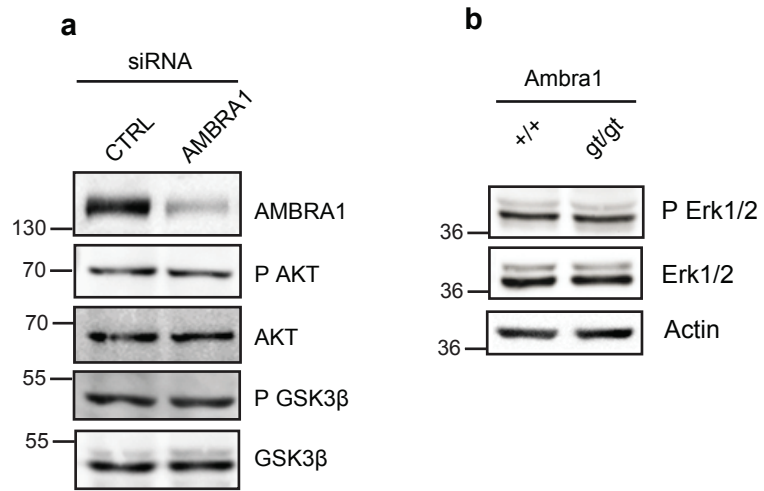

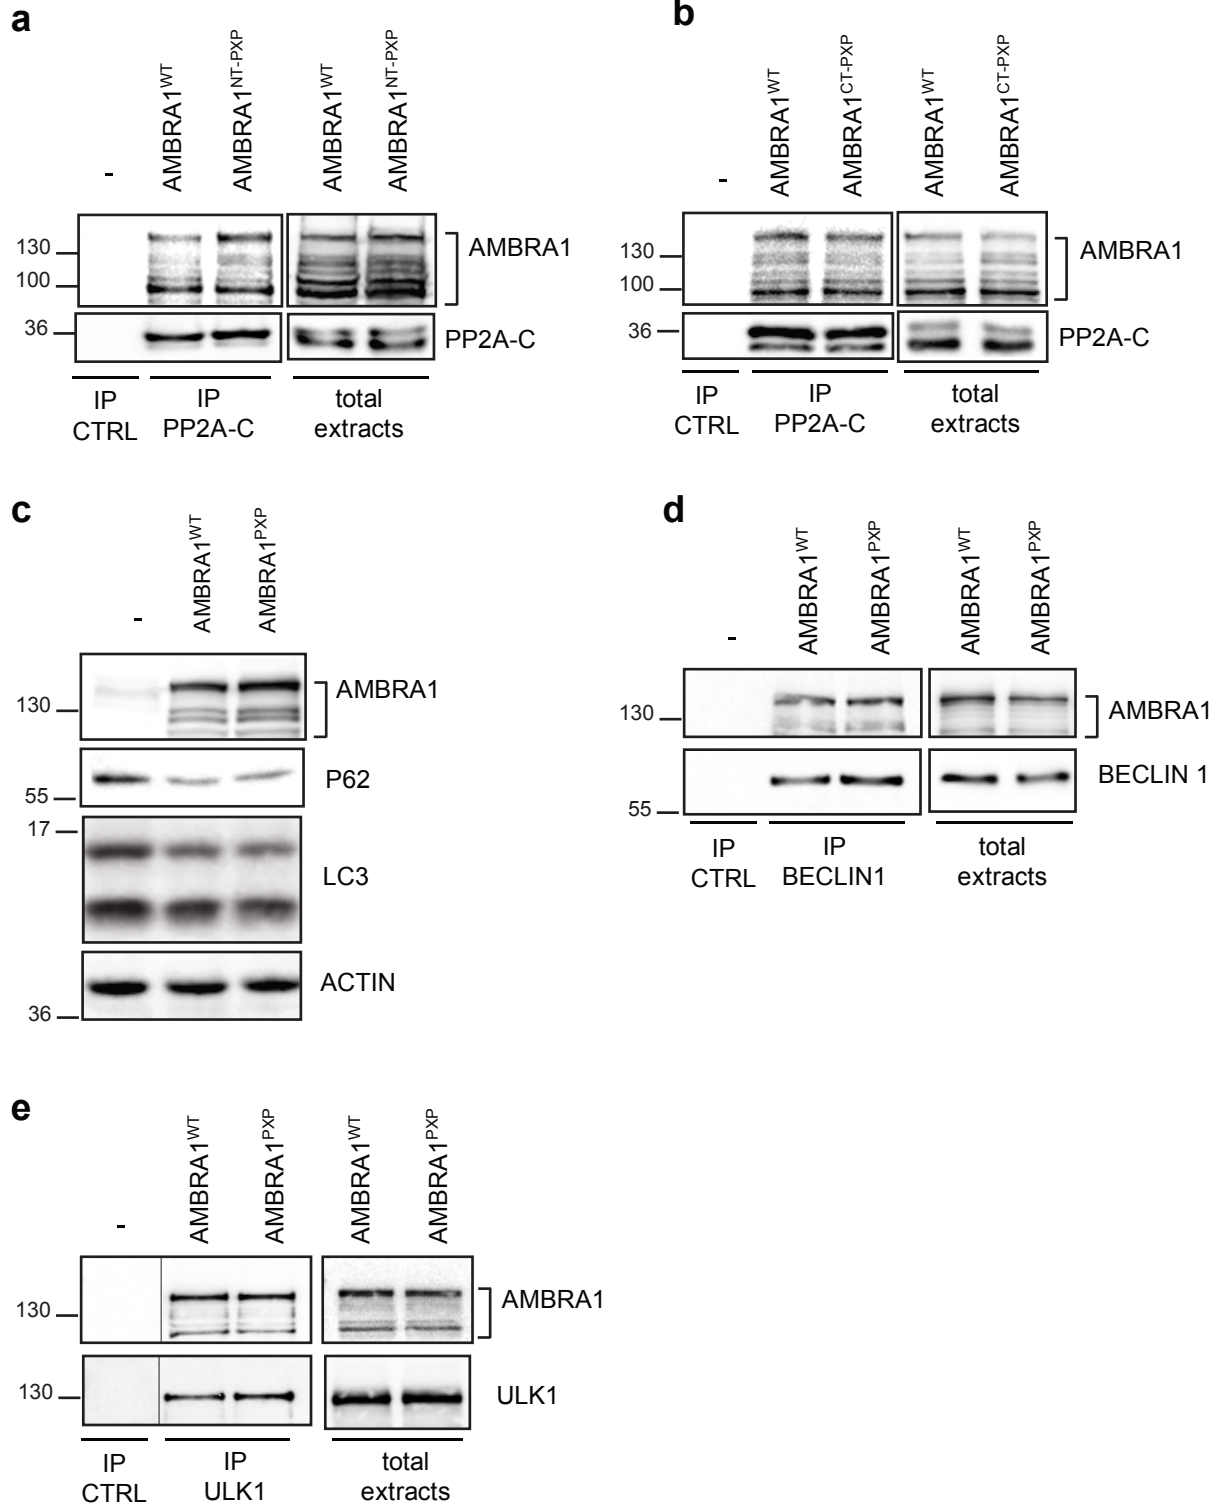

# Supplementary Figure 5

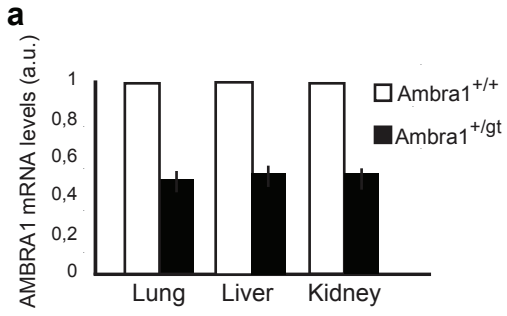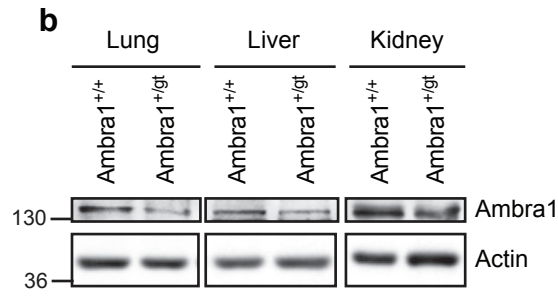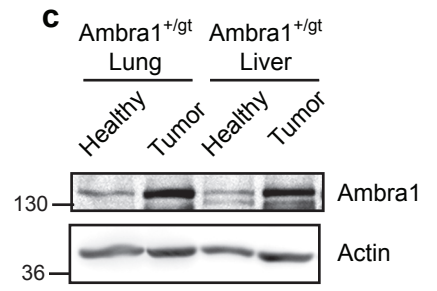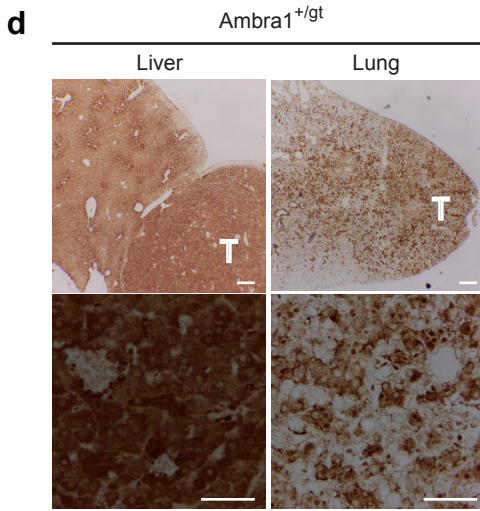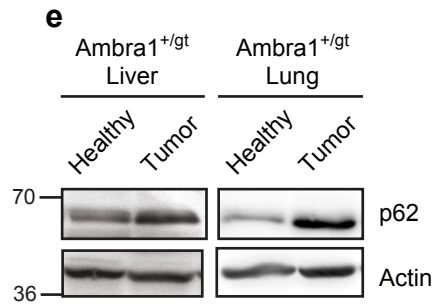

# Supplementary Figure 6

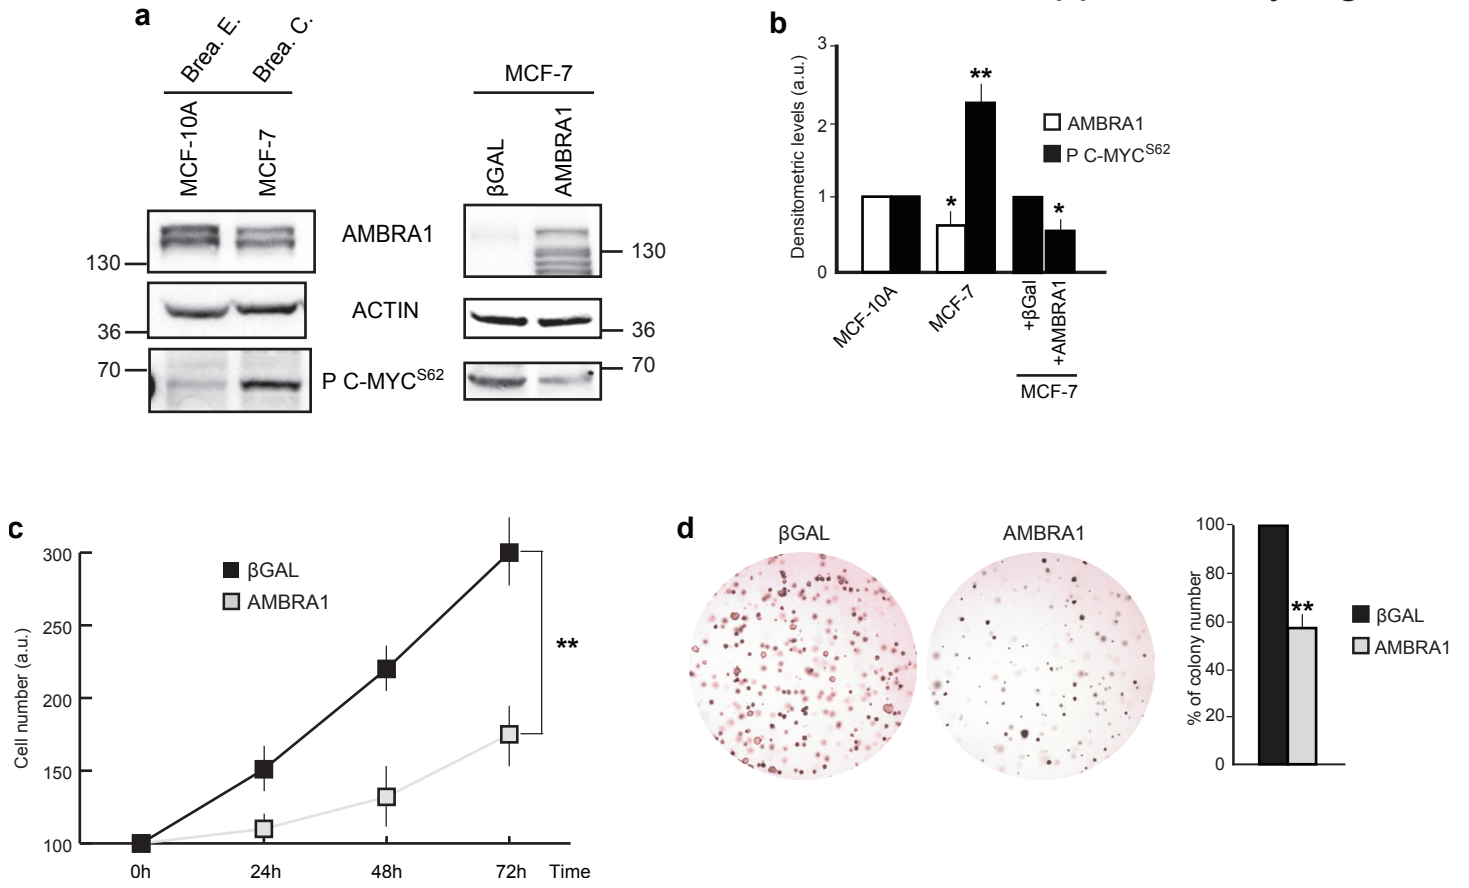

Related to Figure 1e

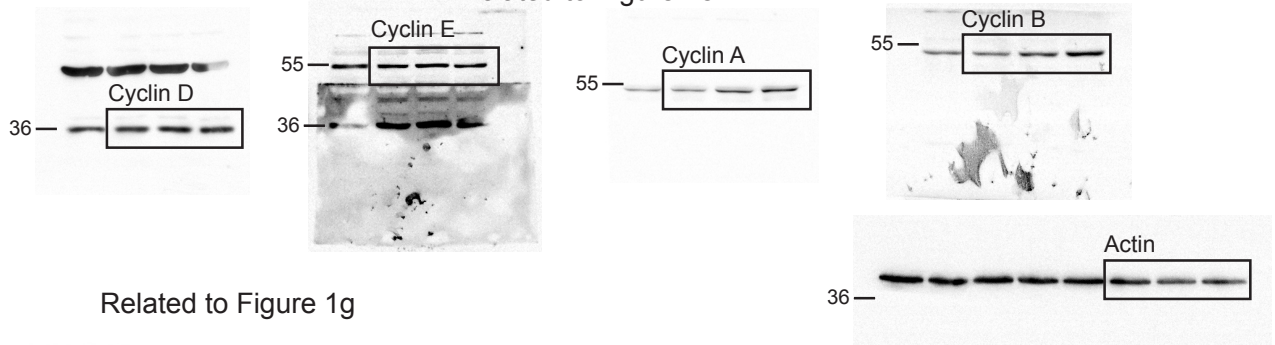

Related to Figure 1g

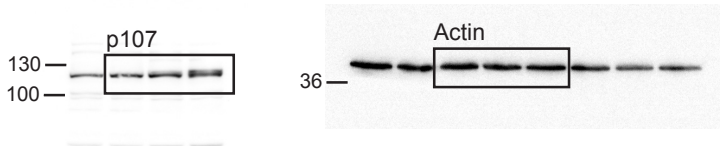

Related to Figure 2b

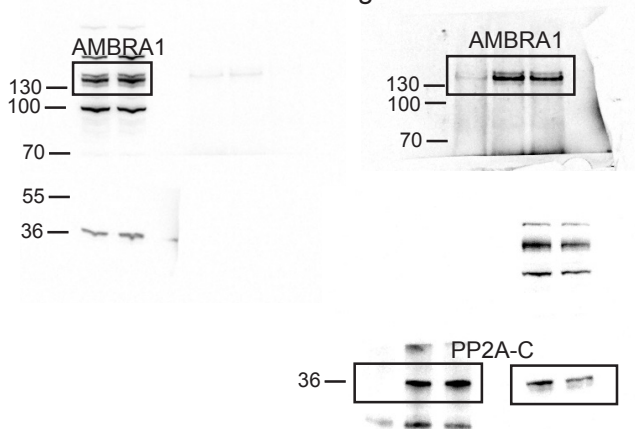

Related to Figure 2c

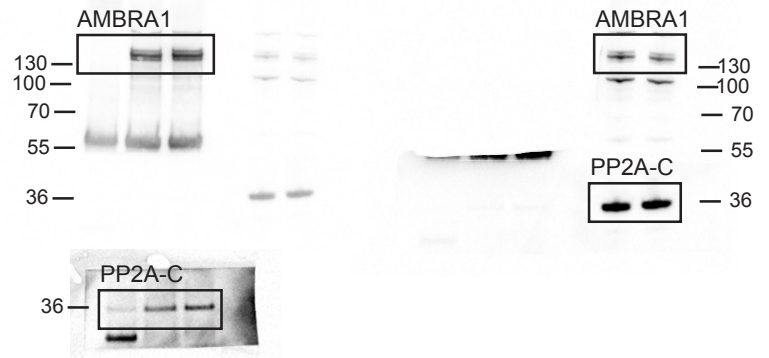

Related to Figure 2d

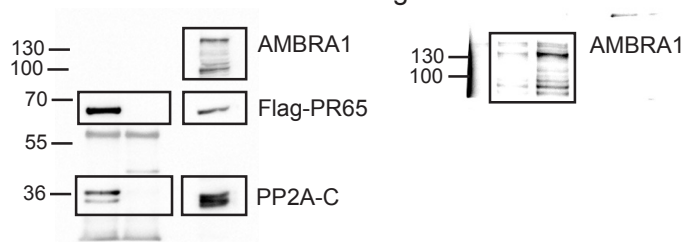

Related to Figure 2e

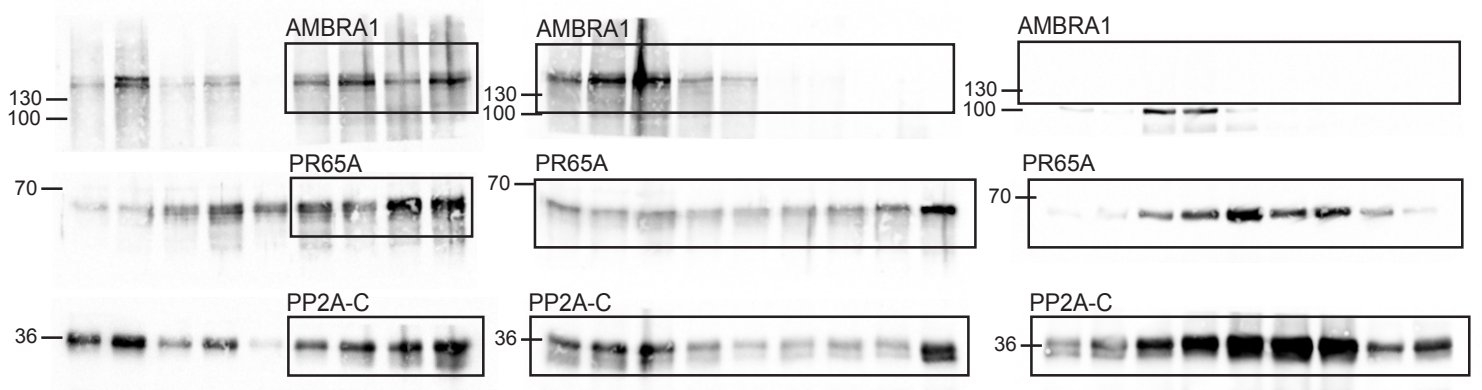

Related to Figure 3a

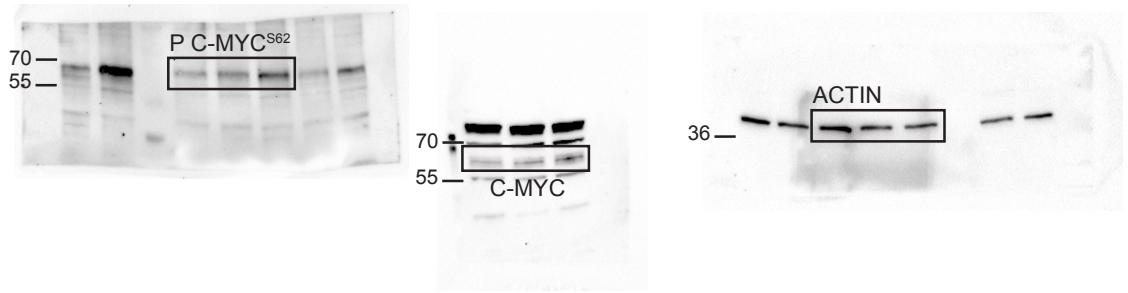

Related to Figure 3b

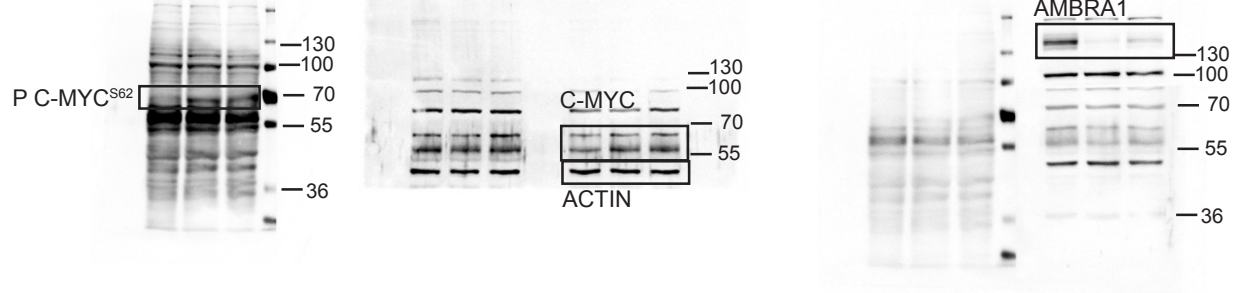

Related to Figure 3d

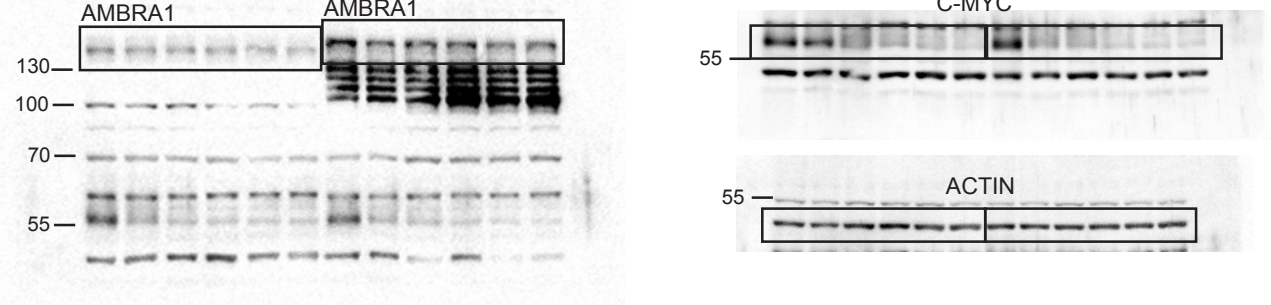

Related to Figure 3e

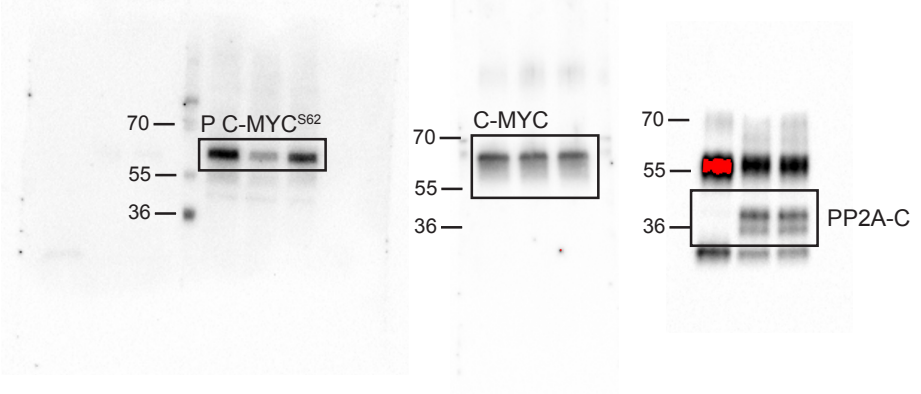

Related to Figure 3f

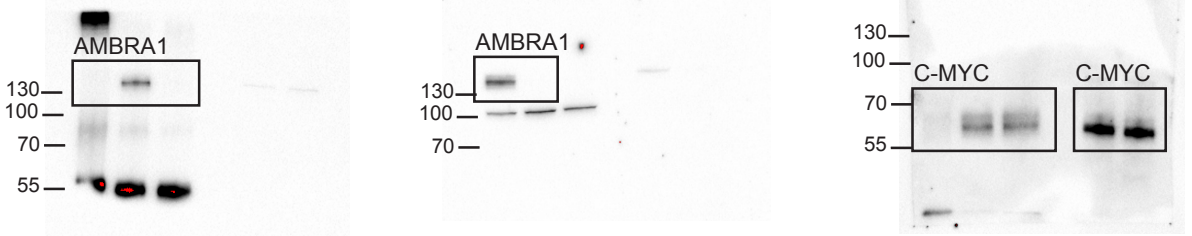



Related to Figure 4a

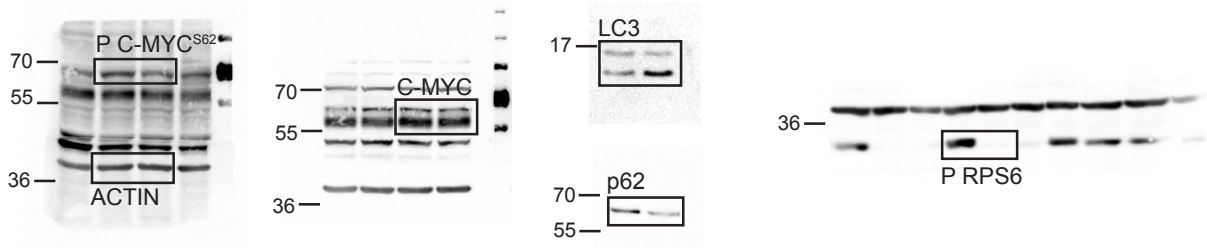

Related to Figure 4b

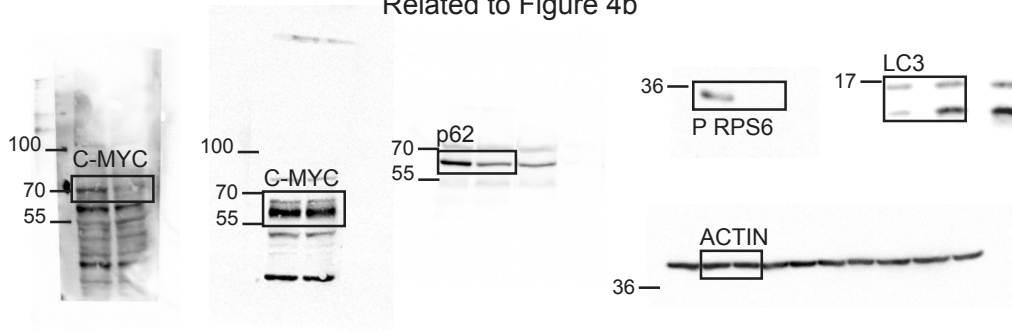

Related to Figure 4c

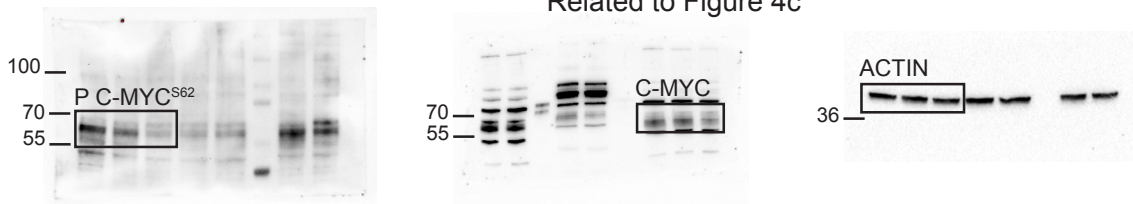

Related to Figure 4d

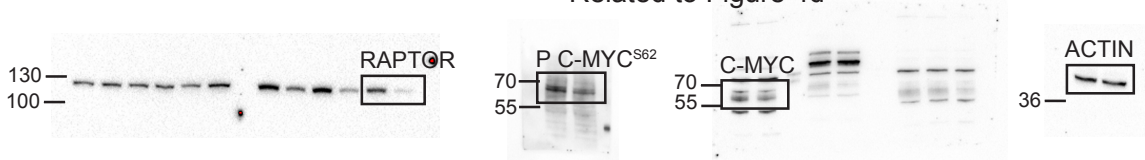

Related to Figure 4e

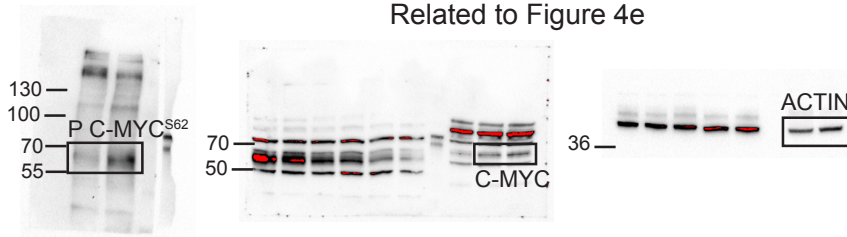

Related to Figure 4f

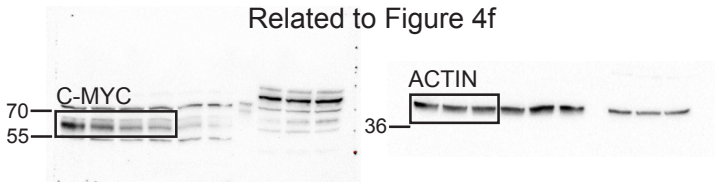

Related to Figure 4g

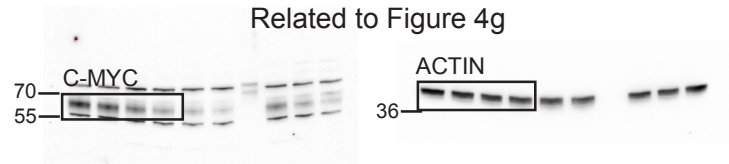

Related to Figure 4h

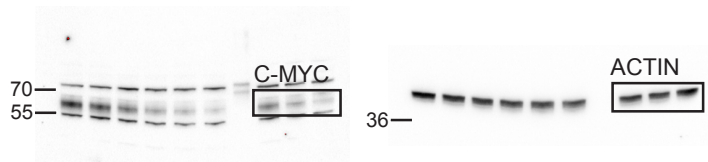

Related to Figure 4i

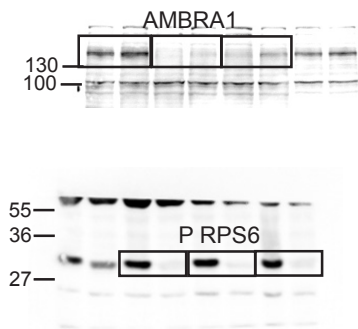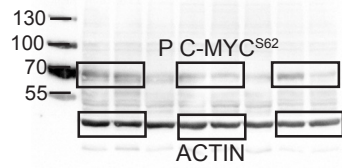

Related to Figure 4j

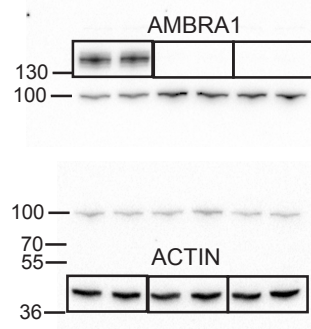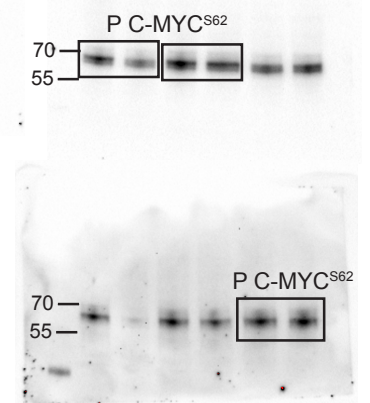

Related to Figure 4k

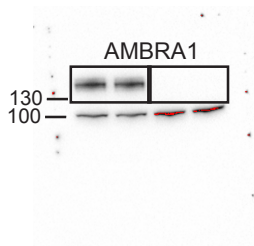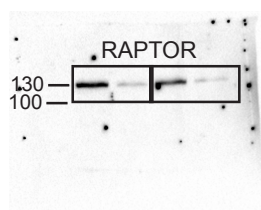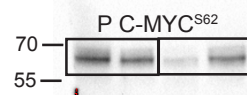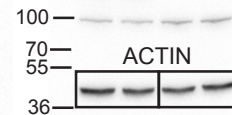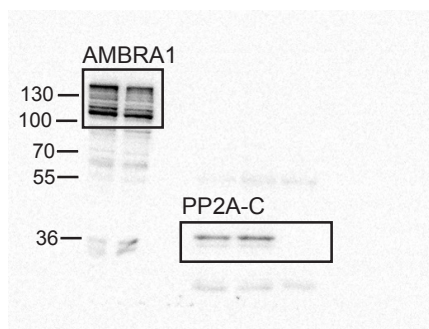

Related to Figure 5a

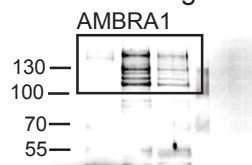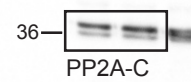

Related to Figure 5b

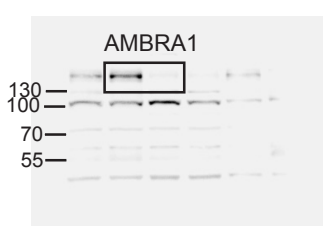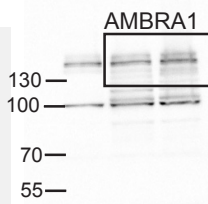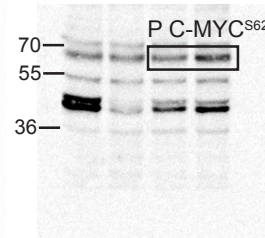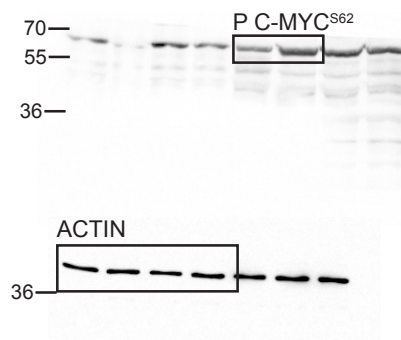

Related to Figure 5e

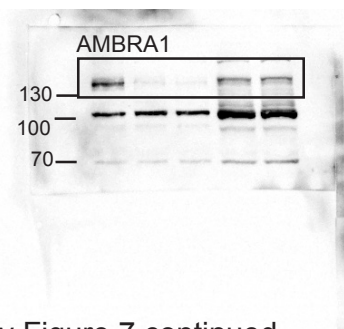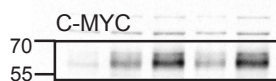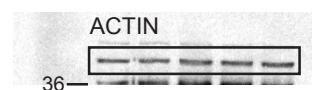

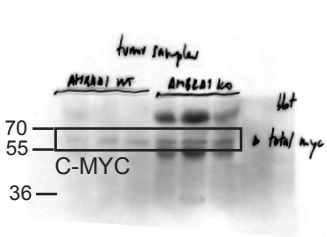

Related to Figure 6b

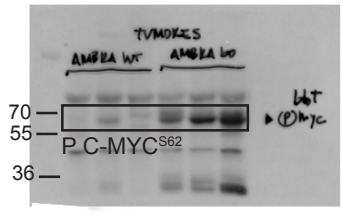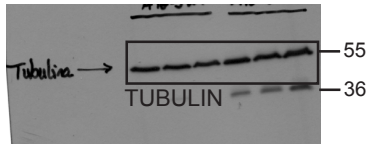

Related to Figure 6g

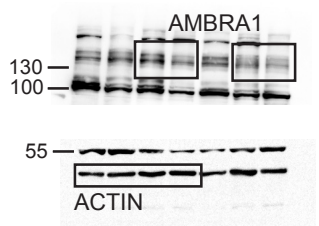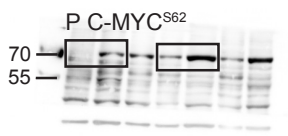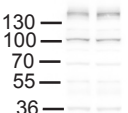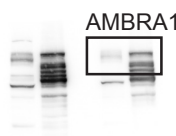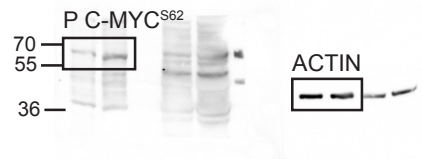

Supplement: NIHMS60797-supplement-Supplementary_figures_1-7.pdf [file NIHMS60797-supplement-Supplementary_figures_1-7.pdf]
